# Supplementary material for: Effects of self-reported sensitivity and road-traffic noise levels on the immune system
Source: PubMed Central journal article supplement (PMC5662213; doi:10.1371/journal.pone.0187084), 2017-10-30
Supplement: pone.0187084.s001.pdf [file pone.0187084.s001.pdf]

| Using sample | Blood test | ID   | Region | Noise_Ldn | Age | Sex    | Noise_sensitivity | Education            | Income            | Alcohol | Smoking | regular exercise | Residence period(year) | SRI_MF | Cortisol | NK cells | NKT cells | IL12        | INFgamma    |
|--------------|------------|------|--------|-----------|-----|--------|-------------------|----------------------|-------------------|---------|---------|------------------|------------------------|--------|----------|----------|-----------|-------------|-------------|
| Y            | Y          | u-1  | ulsan  | 65.00     | 36  | male   | 1                 | high school and less | under 3000 KRW    | 1.00    | 1.00    | 2.00             | 8.00                   | 0.00   | 10.70    | 26.30    | 0.1       | 3.566108957 | 26.63265306 |
| Y            | Y          | u-2  | ulsan  | 58.00     | 42  | female | 6                 | 999                  | 3000 KRW and more | 2.00    | 1.00    | 2.00             | 9.00                   | 0.00   | 11.60    | 13.40    | 0.1       | 4.183431953 | 27.00510204 |
| Y            | Y          | u-3  | ulsan  | 47.00     | 51  | female | 3                 | high school and less | 3000 KRW and more | 1.00    | 1.00    | 2.00             | 16.00                  | 0.00   | 11.80    | 15.00    | 0.77      | 3.230769231 | 9.234693878 |
| Y            | Y          | u-4  | ulsan  | 51.00     | 24  | female | 5                 | college and more     | under 3000 KRW    | 2.00    | 2.00    | 1.00             | 6.00                   | 7.00   | 22.00    | 5.50     | 0.06      | 3.615792695 | 20.54591837 |
| Y            | Y          | u-5  | ulsan  | 67.00     | 57  | female | 7                 | high school and less | 3000 KRW and more | 1.00    | 1.00    | 1.00             | 19.00                  | 0.00   | 20.40    | 36.10    | 0.06      | 3.596306876 | 22.24489796 |
| Y            | Y          | u-6  | ulsan  | 64.00     | 30  | female | 6                 | college and more     | 3000 KRW and more | 1.00    | 1.00    | 2.00             | 3.00                   | 6.00   | 11.70    | 15.90    | 0         | 4.0076515   | 29.76530612 |
| Y            | Y          | u-7  | ulsan  | 64.00     | 32  | female | 10                | college and more     | 3000 KRW and more | 2.00    | 1.00    | 1.00             | 20.00                  | 2.00   | 9.50     | 11.70    | 2.13      | 3.844215466 | 33.84693878 |
| Y            | Y          | u-8  | ulsan  | 51.00     | 38  | female | 6                 | high school and less | 3000 KRW and more | 2.00    | 1.00    | 1.00             | 5.00                   | 2.00   | 16.50    | 7.80     | 0.48      | 3.829320547 | 33.31122449 |
| Y            | Y          | u-9  | ulsan  | 64.00     | 35  | female | 4                 | college and more     | under 3000 KRW    | 2.00    | 1.00    | 2.00             | 0.00                   | 3.00   | 8.20     | 13.90    | 1.78      | 2.601226994 | 35.4193038  |
| Y            | Y          | u-10 | ulsan  | 65.00     | 40  | female | 3                 | college and more     | 3000 KRW and more | 1.00    | 1.00    | 2.00             | 5.00                   | 0.00   | 12.30    | 12.10    | 0.08      | 3.925729443 | 21.05102041 |
| Y            | Y          | u-11 | ulsan  | 57.00     | 44  | female | 3                 | college and more     | 3000 KRW and more | 1.00    | 1.00    | 1.00             | 6.00                   | 1.00   | 15.40    | 13.30    | 0.08      | 3.604774536 | 27.1122449  |
| Y            | Y          | u-12 | ulsan  | 43.00     | 52  | female | 7                 | high school and less | 3000 KRW and more | 2.00    | 1.00    | 1.00             | 12.00                  | 7.00   | 18.60    | 21.80    | 0         | 3.887267905 | 17.89285714 |
| Y            | Y          | u-13 | ulsan  | 69.00     | 37  | female | 7                 | college and more     | 3000 KRW and more | 2.00    | 1.00    | 2.00             | 5.00                   | 0.00   | 11.20    | 17.40    | 1.67      | 4.056110998 | 45.75510204 |
| Y            | Y          | u-14 | ulsan  | 68.00     | 34  | female | 3                 | high school and less | 3000 KRW and more | 2.00    | 1.00    | 2.00             | 5.00                   | 6.00   | 11.90    | 11.40    | 0.56      | 3.272189349 | 20.00510204 |
| Y            | Y          | u-15 | ulsan  | 67.00     | 36  | female | 5                 | college and more     | 3000 KRW and more | 2.00    | 1.00    | 1.00             | 3.00                   | 8.00   | 16.80    | 16.10    | 0.06      | 4.089879616 | 39.09693878 |
| Y            | Y          | u-16 | ulsan  | 43.00     | 58  | female | 7                 | high school and less | under 3000 KRW    | 2.00    | 1.00    | 2.00             | 19.00                  | 0.00   | 14.50    | 12.70    | 2.1       | 3.465721281 | 5.704081633 |
| Y            | Y          | u-17 | ulsan  | 49.00     | 55  | female | 7                 | college and more     | 3000 KRW and more | 1.00    | 1.00    | 2.00             | 18.00                  | 0.00   | 18.90    | 12.40    | 0.5       | 3.276270149 | 10.95918367 |
| Y            | Y          | u-18 | ulsan  | 50.00     | 54  | female | 6                 | high school and less | 3000 KRW and more | 2.00    | 1.00    | 2.00             | 7.00                   | 7.00   | 8.50     | 16.20    | 0.48      | 3.558763518 | 8.076530612 |
| Y            | Y          | u-19 | ulsan  | 45.00     | 52  | female | 7                 | high school and less | 3000 KRW and more | 2.00    | 1.00    | 2.00             | 1.00                   | 4.00   | 13.70    | 19.10    | 0.24      | 3.713629871 | 11.96938776 |
| Y            | Y          | u-20 | ulsan  | 57.00     | 51  | female | 6                 | college and more     | 3000 KRW and more | 1.00    | 1.00    | 1.00             | 13.00                  | 0.00   | 15.00    | 14.20    | 0         | 3.428381963 | 12.50510204 |
| Y            | Y          | u-21 | ulsan  | 53.00     | 34  | female | 8                 | high school and less | 3000 KRW and more | 2.00    | 1.00    | 1.00             | 0.00                   | 9.00   | 9.80     | 24.80    | 0.2       | 3.528667619 | 24.80612245 |
| Y            | Y          | u-22 | ulsan  | 49.00     | 33  | female | 7                 | college and more     | 3000 KRW and more | 2.00    | 1.00    | 2.00             | 3.00                   | 0.00   | 7.90     | 8.70     | 0.02      | 3.321465007 | 75.31632653 |
| Y            | Y          | u-23 | ulsan  | 49.00     | 42  | female | 6                 | 999                  | 3000 KRW and more | 2.00    | 1.00    | 1.00             | 18.00                  | 0.00   | 7.60     | 16.00    | 1.44      | 3.289328708 | 8.892857143 |
| Y            | Y          | u-24 | ulsan  | 51.00     | 43  | female | 6                 | college and more     | 3000 KRW and more | 1.00    | 1.00    | 2.00             | 10.00                  | 0.00   | 17.50    | 16.60    | 0.04      | 3.314935727 | 16.76530612 |
| Y            | Y          | u-25 | ulsan  | 77.00     | 39  | female | 8                 | college and more     | 3000 KRW and more | 2.00    | 1.00    | 1.00             | 8.00                   | 3.00   | 8.80     | 29.00    | 0.5       | 3.25351969  | 21.23469388 |
| Y            | Y          | u-26 | ulsan  | 70.00     | 29  | female | 3                 | college and more     | 3000 KRW and more | 2.00    | 1.00    | 2.00             | 7.00                   | 0.00   | 17.10    | 12.40    | 0.84      | 2.319347064 | 30.843      |
| Y            | Y          | u-27 | ulsan  | 70.00     | 45  | female | 2                 | high school and less | 3000 KRW and more | 2.00    | 1.00    | 2.00             | 2.00                   | 0.00   | 12.30    | 6.90     | 0.02      | 3.966231381 | 20.20408163 |
| Y            | Y          | u-28 | ulsan  | 70.00     | 51  | female | 4                 | college and more     | 3000 KRW and more | 2.00    | 1.00    | 2.00             | 5.00                   | 0.00   | 7.80     | 15.10    | 0.4       | 3.486227301 | 14.55102041 |
| Y            | Y          | u-29 | ulsan  | 60.00     | 42  | female | 6                 | high school and less | 3000 KRW and more | 2.00    | 1.00    | 1.00             | 5.00                   | 1.00   | 17.80    | 21.60    | 1.68      | 3.986941441 | 39.21938776 |
| Y            | Y          | u-30 | ulsan  | 63.00     | 21  | female | 7                 | college and more     | 3000 KRW and more | 2.00    | 1.00    | 2.00             | 3.00                   | 14.00  | 24.80    | 17.90    | 0.02      | 5.442460722 | 62.3622449  |
| Y            | Y          | u-31 | ulsan  | 63.00     | 79  | female | 5                 | high school and less | 3000 KRW and more | 2.00    | 1.00    | 2.00             | 3.00                   | 26.00  | 7.50     | 35.80    | 0.28      | 3.654050194 | 21.19387755 |
| Y            | Y          | u-32 | ulsan  | 45.00     | 38  | female | 7                 | high school and less | 3000 KRW and more | 1.00    | 1.00    | 1.00             | 1.00                   | 1.00   | 9.50     | 14.10    | 4.21      | 2.573948291 | 32.02373418 |
| Y            | Y          | u-33 | ulsan  | 52.00     | 56  | female | 2                 | high school and less | 3000 KRW and more | 1.00    | 1.00    | 1.00             | 20.00                  | 1.00   | 10.20    | 14.20    | 0         | 6.116302795 | 42.15816327 |
| Y            | Y          | u-34 | ulsan  | 52.00     | 52  | female | 6                 | high school and less | 3000 KRW and more | 2.00    | 1.00    | 1.00             | 24.00                  | 0.00   | 10.10    | 27.70    | 0.49      | 3.599673536 | 8.290816327 |
| Y            | Y          | u-35 | ulsan  | 53.00     | 47  | female | 2                 | college and more     | 3000 KRW and more | 2.00    | 1.00    | 2.00             | 5.00                   | 0.00   | 7.10     | 15.50    | 0.02      | 4.578759437 | 44.00510204 |
| Y            | Y          | u-36 | ulsan  | 56.00     | 40  | female | 6                 | college and more     | 3000 KRW and more | 1.00    | 1.00    | 1.00             | 6.00                   | 1.00   | 7.60     | 15.30    | 2.19      | 3.49908182  | 62.90816327 |
| Y            | Y          | u-37 | ulsan  | 66.00     | 45  | female | 8                 | high school and less | 3000 KRW and more | 1.00    | 1.00    | 2.00             | 10.00                  | 0.00   | 9.30     | 9.70     | 0.1       | 4.131809835 | 18.66836735 |
| Y            | Y          | u-38 | ulsan  | 66.00     | 42  | female | 5                 | college and more     | 3000 KRW and more | 2.00    | 1.00    | 1.00             | 5.00                   | 1.00   | 8.20     | 19.30    | 0.16      | 3.787900428 | 26.60714286 |
| Y            | Y          | u-39 | ulsan  | 68.00     | 44  | female | 2                 | high school and less | 3000 KRW and more | 1.00    | 1.00    | 1.00             | 12.00                  | 0.00   | 5.00     | 14.60    | 1.53      | 3.807692308 | 13.72959184 |
| Y            | Y          | u-40 | ulsan  | 67.00     | 46  | female | 3                 | high school and less | 3000 KRW and more | 2.00    | 1.00    | 1.00             | 4.00                   | 0.00   | 23.00    | 20.00    | 0.08      | 4.116200775 | 17.44387755 |
| Y            | Y          | u-41 | ulsan  | 87.00     | 53  | female | 2                 | high school and less | 3000 KRW and more | 1.00    | 1.00    | 1.00             | 18.00                  | 0.00   | 11.30    | 22.10    | 1.86      | 3.265354009 | 9.183673469 |
| Y            | Y          | u-42 | ulsan  | 54.00     | 53  | female | 2                 | high school and less | 3000 KRW and more | 2.00    | 1.00    | 1.00             | 17.00                  | 0.00   | 13.60    | 6.80     | 0.61      | 3.164660273 | 4.454081633 |
| Y            | Y          | u-43 | ulsan  | 58.00     | 36  | female | 7                 | college and more     | 3000 KRW and more | 2.00    | 1.00    | 2.00             | 8.00                   | 1.00   | 7.80     | 25.00    | 0.02      | 4.206590492 | 21.41836735 |
| Y            | Y          | u-44 | ulsan  | 56.00     | 49  | female | 2                 | high school and less | 3000 KRW and more | 2.00    | 1.00    | 2.00             | 15.00                  | 0.00   | 10.20    | 17.30    | 0.16      | 4.286472149 | 22.15306122 |
| Y            | Y          | u-45 | ulsan  | 60.00     | 1   | male   | 1                 | high school and less | under 3000 KRW    | 1.00    | 1.00    | 1.00             | 17.00                  | 1.00   | 7.30     | 6.50     | 0.82      | 3.454601102 | 9.423469388 |
| Y            | Y          | u-46 | ulsan  | 53.00     | 34  | female | 0                 | college and more     | under 3000 KRW    | 1.00    | 1.00    | 1.00             | 6.00                   | 7.00   | 9.20     | 13.90    | 0.3       | 3.457253622 | 9.959183673 |
| Y            | Y          | u-47 | ulsan  | 60.00     | 45  | female | 6                 | college and more     | 3000 KRW and more | 1.00    | 1.00    | 2.00             | 17.00                  | 2.00   | 17.90    | 23.80    | 23.82     | 3.897775964 | 13.41326531 |
| Y            | Y          | u-48 | ulsan  | 67.00     | 57  | female | 7                 | high school and less | 3000 KRW and more | 1.00    | 1.00    | 1.00             | 5.00                   | 1.00   | 14.70    | 24.20    | 0.02      | 3.650275454 | 15.6377551  |
| Y            | Y          | u-49 | ulsan  | 66.00     | 30  | female | 2                 | college and more     | 3000 KRW and more | 2.00    | 1.00    | 2.00             | 3.00                   | 0.00   | 17.40    | 12.60    | 0.61      | 3.671597633 | 91.14795918 |
| Y            | Y          | u-50 | ulsan  | 66.00     | 53  | female | 5                 | high school and less | 3000 KRW and more | 2.00    | 1.00    | 2.00             | 3.00                   | 1.00   | 13.30    | 19.00    | 0.06      | 4.25321363  | 117.7908163 |
| Y            | Y          | u-51 | ulsan  | 64.00     | 38  | female | 7                 | college and more     | 3000 KRW and more | 2.00    | 1.00    | 2.00             | 1.00                   | 1.00   | 9.60     | 12.20    | 0.64      | 3.24209345  | 22.69387755 |
| Y            | Y          | u-52 | ulsan  | 55.00     | 52  | female | 6                 | high school and less | 3000 KRW and more | 2.00    | 1.00    | 1.00             | 3.00                   | 2.00   | 18.60    | 16.00    | 0.68      | 3.343501326 | 12.12755102 |
| Y            | Y          | u-53 | ulsan  | 53.00     | 51  | female | 4                 | high school and less | 3000 KRW and more | 2.00    | 1.00    | 1.00             | 2.00                   | 0.00   | 12.10    | 31.70    | 0.42      | 3.333809427 | 18.89795918 |
| Y            | Y          | u-54 | ulsan  | 59.00     | 41  | female | 1                 | college and more     | 3000 KRW and more | 2.00    | 1.00    | 1.00             | 6.00                   | 0.00   | 15.10    | 13.50    | 0.12      | 4.095184656 | 16.13265306 |
| Y            | Y          | u-55 | ulsan  | 51.00     | 48  | female | 8                 | high school and less | 3000 KRW and more | 1.00    | 1.00    | 1.00             | 7.00                   | 1.00   | 12.10    | 9.70     | 0.96      | 4.26015099  | 40.15306122 |
| Y            | Y          | u-56 | ulsan  | 56.00     | 52  | female | 2                 | high school and less | 3000 KRW and more | 2.00    | 1.00    | 1.00             | 20.00                  | 0.00   | 17.90    | 15.40    | 0.42      | 3.517649459 | 22.92346939 |
| Y            | Y          | u-57 | ulsan  | 62.00     | 54  | female | 8                 | high school and less | 3000 KRW and more | 2.00    | 1.00    | 1.00             | 10.00                  | 1.00   | 25.80    | 25.00    | 0.16      | 4.566108957 | 27.70408163 |

|   |   |       |       |       |           |                        |                   |      |      |      |       |       |       |       |      |             |             |
|---|---|-------|-------|-------|-----------|------------------------|-------------------|------|------|------|-------|-------|-------|-------|------|-------------|-------------|
| Y | Y | u-58  | ulsan | 74.00 | 45 female | 7 college and more     | 3000 KRW and more | 1.00 | 1.00 | 1.00 | 11.00 | 1.00  | 15.20 | 8.70  | 0.3  | 3.49255254  | 15.11734694 |
| Y | Y | u-59  | ulsan | 55.00 | 40 female | 8 college and more     | 3000 KRW and more | 1.00 | 1.00 | 1.00 | 3.00  | 1.00  | 17.70 | 14.30 | 0.18 | 4.25688635  | 13.52040816 |
| Y | Y | u-60  | ulsan | 55.00 | 52 female | 5 college and more     | 3000 KRW and more | 2.00 | 1.00 | 1.00 | 14.00 | 1.00  | 16.60 | 15.30 | 0.48 | 3.552642318 | 16.2244898  |
| Y | Y | u-61  | ulsan | 55.00 | 20 female | 6 college and more     | 3000 KRW and more | 2.00 | 1.00 | 2.00 | 14.00 | 1.00  | 20.70 | 8.40  | 0.6  | 3.711691492 | 23.92857143 |
| Y | Y | u-62  | ulsan | 72.00 | 49 female | 2 high school and less | 3000 KRW and more | 1.00 | 1.00 | 1.00 | 7.00  | 0.00  | 8.60  | 6.10  | 0.12 | 4.443276882 | 26.60204082 |
| Y | Y | u-63  | ulsan | 73.00 | 73 female | 7 college and more     | 3000 KRW and more | 2.00 | 1.00 | 1.00 | 25.00 | 0.00  | 17.10 | 28.50 | 0.6  | 3.427769843 | 12.62755102 |
| Y | Y | u-64  | ulsan | 63.00 | 48 female | 8 college and more     | under 3000 KRW    | 1.00 | 1.00 | 2.00 | 21.00 | 0.00  | 15.10 | 9.20  | 0    | 4.126810855 | 38.17857143 |
| Y | Y | u-65  | ulsan | 67.00 | 36 female | 2 high school and less | 3000 KRW and more | 2.00 | 1.00 | 2.00 | 2.00  | 0.00  | 14.30 | 14.90 | 0.56 | 3.381452765 | 6.37244898  |
| Y | Y | u-66  | ulsan | 71.00 | 50 female | 6 high school and less | 3000 KRW and more | 1.00 | 1.00 | 1.00 | 17.00 | 3.00  | 9.50  | 17.70 | 0.16 | 3.790042848 | 13.23979592 |
| Y | Y | u-67  | ulsan | 69.00 | 44 female | 7 high school and less | 3000 KRW and more | 1.00 | 1.00 | 2.00 | 18.00 | 1.00  | 20.20 | 19.20 | 0.04 | 3.560497858 | 27.33163265 |
| Y | Y | u-68  | ulsan | 70.00 | 52 female | 9 high school and less | 3000 KRW and more | 1.00 | 1.00 | 1.00 | 17.00 | 1.00  | 8.60  | 24.80 | 0    | 4.311671088 | 26.40816327 |
| Y | Y | u-69  | ulsan | 70.00 | 23 female | 5 college and more     | 3000 KRW and more | 2.00 | 1.00 | 2.00 | 17.00 | 0.00  | 16.60 | 10.70 | 0.01 | 4.385227505 | 29.0255102  |
| Y | Y | u-70  | ulsan | 68.00 | 50 female | 5 high school and less | 3000 KRW and more | 2.00 | 1.00 | 1.00 | 17.00 | 1.00  | 12.10 | 20.40 | 1.63 | 3.423280963 | 16.54081633 |
| Y | Y | u-71  | ulsan | 66.00 | 46 female | 2 high school and less | 3000 KRW and more | 2.00 | 1.00 | 1.00 | 14.00 | 0.00  | 13.00 | 22.20 | 0    | 3.782493369 | 30.07142857 |
| Y | Y | u-72  | ulsan | 67.00 | 45 female | 1 college and more     | 3000 KRW and more | 2.00 | 1.00 | 1.00 | 17.00 | 4.00  | 17.50 | 29.40 | 0.18 | 3.180983473 | 19.6377551  |
| Y | Y | u-73  | ulsan | 68.00 | 55 female | 7 high school and less | 3000 KRW and more | 2.00 | 1.00 | 2.00 | 17.00 | 1.00  | 8.70  | 24.20 | 0.04 | 3.295449908 | 15.41836735 |
| Y | Y | u-74  | ulsan | 67.00 | 47 female | 4 high school and less | 3000 KRW and more | 2.00 | 1.00 | 2.00 | 19.00 | 1.00  | 7.60  | 16.80 | 0.24 | 4.056723118 | 11.69897959 |
| Y | Y | u-75  | ulsan | 52.00 | 43 female | 0 college and more     | under 3000 KRW    | 1.00 | 1.00 | 1.00 | 5.00  | 0.00  | 9.50  | 27.90 | 0.35 | 4.856253826 | 43.75510204 |
| Y | Y | u-76  | ulsan | 66.00 | 37 female | 8 college and more     | 3000 KRW and more | 1.00 | 1.00 | 2.00 | 8.00  | 1.00  | 10.50 | 7.40  | 0.56 | 3.357580086 | 14.49489796 |
| Y | Y | u-77  | ulsan | 65.00 | 48 female | 5 high school and less | 3000 KRW and more | 2.00 | 1.00 | 1.00 | 2.00  | 1.00  | 15.90 | 20.40 | 0.36 | 3.23811467  | 7.790816327 |
| Y | Y | u-78  | ulsan | 70.00 | 39 female | 8 college and more     | 3000 KRW and more | 2.00 | 1.00 | 1.00 | 6.00  | 0.00  | 11.40 | 17.80 | 0.04 | 3.413385023 | 23.16836735 |
| Y | Y | u-79  | ulsan | 71.00 | 27 female | 4 college and more     | 3000 KRW and more | 1.00 | 1.00 | 2.00 | 10.00 | 12.00 | 23.60 | 12.40 | 0.02 | 4.285145889 | 124.3826531 |
| Y | Y | u-80  | ulsan | 71.00 | 54 female | 6 college and more     | 3000 KRW and more | 2.00 | 1.00 | 1.00 | 10.00 | 19.00 | 16.20 | 21.90 | 1.92 | 4.195368292 | 29.31122449 |
| Y | Y | u-81  | ulsan | 71.00 | 60 female | 5 high school and less | 3000 KRW and more | 2.00 | 1.00 | 2.00 | 9.00  | 9.00  | 6.20  | 18.40 | 0.04 | 3.443684962 | 23.2244898  |
| Y | Y | u-82  | ulsan | 71.00 | 33 female | 6 college and more     | 3000 KRW and more | 2.00 | 1.00 | 2.00 | 9.00  | 12.00 | 26.90 | 6.40  | 0.04 | 3.693021832 | 33.81632653 |
| Y | Y | u-83  | ulsan | 66.00 | 45 female | 5 college and more     | 3000 KRW and more | 2.00 | 1.00 | 1.00 | 3.00  | 0.00  | 17.30 | 21.70 | 1.04 | 2.637489045 | 32.9414557  |
| Y | Y | u-84  | ulsan | 52.00 | 40 female | 4 high school and less | 3000 KRW and more | 1.00 | 1.00 | 1.00 | 4.00  | 1.00  | 6.00  | 10.80 | 0.04 | 3.717302591 | 12.28571429 |
| Y | Y | u-85  | ulsan | 59.00 | 35 female | 3 college and more     | 3000 KRW and more | 2.00 | 1.00 | 1.00 | 27.00 | 0.00  | 9.20  | 13.30 | 0.02 | 3.402468884 | 44.81632653 |
| Y | Y | u-86  | ulsan | 52.00 | 30 female | 6 high school and less | under 3000 KRW    | 2.00 | 1.00 | 2.00 | 0.00  | 22.00 | 25.50 | 16.50 | 0.92 | 3.678432973 | 20.39795918 |
| Y | Y | u-87  | ulsan | 76.00 | 53 female | 7 college and more     | 3000 KRW and more | 2.00 | 1.00 | 2.00 | 5.00  | 0.00  | 13.50 | 10.80 | 0.06 | 6.482860641 | 228.9540816 |
| Y | Y | u-88  | ulsan | 50.00 | 31 female | 4 high school and less | under 3000 KRW    | 2.00 | 2.00 | 2.00 | 1.00  | 14.00 | 6.50  | 3.90  | 0    | 3.192817792 | 39.04081633 |
| Y | Y | u-89  | ulsan | 56.00 | 28 female | 8 college and more     | under 3000 KRW    | 1.00 | 1.00 | 2.00 | 1.00  | 9.00  | 16.10 | 23.20 | 0.14 | 4.456947562 | 46.08673469 |
| Y | Y | u-90  | ulsan | 46.00 | 56 female | 8 high school and less | 3000 KRW and more | 2.00 | 1.00 | 1.00 | 19.00 | 0.00  | 15.20 | 4.80  | 3.09 | 4.415753725 | 61.64082278 |
| Y | Y | u-91  | ulsan | 47.00 | 40 female | 8 college and more     | 3000 KRW and more | 2.00 | 1.00 | 2.00 | 3.00  | 4.00  | 14.90 | 20.00 | 0    | 3.412466844 | 38.67857143 |
| Y | Y | u-92  | ulsan | 69.00 | 34 female | 6 college and more     | 3000 KRW and more | 1.00 | 1.00 | 2.00 | 1.00  | 3.00  | 7.60  | 16.40 | 0.1  | 4.00877372  | 24.05102041 |
| Y | Y | u-93  | ulsan | 51.00 | 50 female | 3 college and more     | 3000 KRW and more | 1.00 | 1.00 | 1.00 | 15.00 | 0.00  | 7.70  | 14.50 | 0.2  | 3.769026729 | 8.265306122 |
| Y | Y | u-94  | ulsan | 51.00 | 56 female | 5 high school and less | 3000 KRW and more | 2.00 | 1.00 | 2.00 | 17.00 | 3.00  | 15.50 | 19.10 | 0.04 | 4.265354009 | 35.66836735 |
| Y | Y | u-95  | ulsan | 51.00 | 53 female | 3 high school and less | 3000 KRW and more | 2.00 | 1.00 | 1.00 | 15.00 | 0.00  | 11.50 | 14.00 | 0.16 | 3.404713324 | 15.69387755 |
| Y | Y | u-96  | ulsan | 52.00 | 45 female | 2 college and more     | 3000 KRW and more | 2.00 | 1.00 | 1.00 | 10.00 | 0.00  | 10.20 | 17.90 | 0.62 | 3.481024281 | 20.98979592 |
| Y | Y | u-97  | ulsan | 69.00 | 54 female | 6 high school and less | 3000 KRW and more | 1.00 | 1.00 | 1.00 | 16.00 | 2.00  | 22.30 | 28.00 | 0.02 | 3.912262804 | 21.23979592 |
| Y | Y | u-98  | ulsan | 69.00 | 25 female | 7 college and more     | 3000 KRW and more | 2.00 | 1.00 | 2.00 | 16.00 | 0.00  | 27.80 | 12.70 | 0.06 | 4.24250153  | 41.96938776 |
| Y | Y | u-99  | ulsan | 70.00 | 49 female | 10 college and more    | 3000 KRW and more | 2.00 | 1.00 | 1.00 | 10.00 | 1.00  | 12.90 | 44.50 | 1.4  | 4.129157315 | 19.69897959 |
| Y | Y | u-100 | ulsan | 45.00 | 46 female | 6 high school and less | 3000 KRW and more | 1.00 | 1.00 | 1.00 | 23.00 | 4.00  | 13.30 | 21.10 | 0.2  | 4.427973883 | 15.69387755 |
| Y | Y | u-101 | ulsan | 49.00 | 74 female | 8 high school and less | 3000 KRW and more | 2.00 | 1.00 | 2.00 | 27.00 | 3.00  | 22.70 | 41.90 | 0.02 | 3.409814324 | 10.41326531 |
| Y | Y | u-102 | ulsan | 49.00 | 51 female | 3 high school and less | under 3000 KRW    | 1.00 | 1.00 | 1.00 | 8.00  | 0.00  | 10.80 | 15.80 | 0.6  | 3.322791267 | 21.07653061 |
| Y | Y | u-103 | ulsan | 44.00 | 48 female | 8 high school and less | under 3000 KRW    | 1.00 | 2.00 | 2.00 | 4.00  | 4.00  | 16.50 | 4.40  | 0    | 3.75107121  | 23.75510204 |
| Y | Y | u-104 | ulsan | 72.00 | 51 female | 7 high school and less | 3000 KRW and more | 1.00 | 1.00 | 2.00 | 5.00  | 6.00  | 19.10 | 13.10 | 0.7  | 3.737400531 | 23.57653061 |
| Y | Y | u-105 | ulsan | 64.00 | 60 female | 5 high school and less | under 3000 KRW    | 2.00 | 1.00 | 2.00 | 3.00  | 0.00  | 19.40 | 24.60 | 4.05 | 2.198290973 | 27.12341772 |
| Y | Y | u-106 | ulsan | 55.00 | 71 female | 8 high school and less | under 3000 KRW    | 2.00 | 1.00 | 1.00 | 5.00  | 0.00  | 12.10 | 28.90 | 1.16 | 2.28878177  | 27.78164557 |
| Y | Y | u-107 | ulsan | 70.00 | 53 female | 7 college and more     | 3000 KRW and more | 1.00 | 1.00 | 1.00 | 4.00  | 0.00  | 6.90  | 11.20 | 3.27 | 2.227760736 | 29.35601266 |
| Y | Y | u-108 | ulsan | 59.00 | 39 female | 8 college and more     | 3000 KRW and more | 2.00 | 1.00 | 1.00 | 1.00  | 6.00  | 12.30 | 32.50 | 0.02 | 3.609365436 | 24.03571429 |
| Y | Y | u-109 | ulsan | 56.00 | 31 female | 8 college and more     | 3000 KRW and more | 1.00 | 1.00 | 2.00 | 1.00  | 10.00 | 8.60  | 8.80  | 0.2  | 3.660885534 | 35.66836735 |
| Y | Y | u-110 | ulsan | 61.00 | 34 female | 6 college and more     | 3000 KRW and more | 1.00 | 1.00 | 1.00 | 5.00  | 6.00  | 9.40  | 14.80 | 0.88 | 2.546121823 | 31.29746835 |
| Y | Y | u-111 | ulsan | 57.00 | 50 female | 5 high school and less | 3000 KRW and more | 2.00 | 1.00 | 2.00 | 20.00 | 24.00 | 21.90 | 8.90  | 0    | 3.222199551 | 21.5255102  |
| Y | Y | u-112 | ulsan | 57.00 | 23 female | 4 high school and less | 3000 KRW and more | 2.00 | 1.00 | 2.00 | 20.00 | 61.00 | 21.40 | 14.30 | 0.82 | 3.609569476 | 27.48469388 |
| Y | Y | u-113 | ulsan | 53.00 | 61 female | 8 high school and less | 3000 KRW and more | 2.00 | 1.00 | 1.00 | 33.00 | 0.00  | 28.70 | 15.80 | 0.06 | 3.482860641 | 16.6377551  |
| Y | Y | u-114 | ulsan | 46.00 | 28 female | 7 college and more     | 3000 KRW and more | 2.00 | 1.00 | 1.00 | 2.00  | 68.00 | 29.00 | 10.60 | 0.22 | 3.475923281 | 13.57653061 |
| Y | Y | u-115 | ulsan | 62.00 | 60 female | 7 college and more     | 3000 KRW and more | 2.00 | 1.00 | 1.00 | 18.00 | 8.00  | 18.30 | 36.00 | 0.02 | 3.414099163 | 25          |

|   |   |       |       |       |           |                         |                   |        |      |      |        |        |       |       |       |             |             |
|---|---|-------|-------|-------|-----------|-------------------------|-------------------|--------|------|------|--------|--------|-------|-------|-------|-------------|-------------|
| Y | Y | u-116 | ulsan | 61.00 | 60 female | 7 high school and less  | 3000 KRW and more | 1.00   | 1.00 | 1.00 | 1.00   | 15.00  | 12.20 | 27.90 | 0.02  | 3.371556825 | 21.89795918 |
| Y | Y | u-117 | ulsan | 73.00 | 57 female | 5 high school and less  | 3000 KRW and more | 2.00   | 1.00 | 1.00 | 3.00   | 0.00   | 20.30 | 26.60 | 0.04  | 3.290552948 | 17.05102041 |
| Y | Y | u-118 | ulsan | 63.00 | 58 female | 7 high school and less  | under 3000 KRW    | 1.00   | 1.00 | 1.00 | 3.00   | 7.00   | 11.30 | 14.90 | 0.5   | 3.339012446 | 25.08163265 |
| Y | Y | u-119 | ulsan | 66.00 | 44 female | 2 college and more      | under 3000 KRW    | 1.00   | 1.00 | 1.00 | 3.00   | 4.00   | 17.00 | 17.60 | 0.7   | 3.384003265 | 19.67346939 |
| Y | Y | u-120 | ulsan | 49.00 | 55 female | 7 high school and less  | 3000 KRW and more | 2.00   | 1.00 | 1.00 | 22.00  | 0.00   | 12.70 | 16.70 | 0.04  | 3.24954091  | 10.94387755 |
| Y | Y | u-121 | ulsan | 49.00 | 26 female | 3 college and more      | under 3000 KRW    | 1.00   | 1.00 | 1.00 | 22.00  | 0.00   | 11.70 | 11.10 | 0.08  | 3.336972047 | 9.693877551 |
| Y | Y | u-122 | ulsan | 66.00 | 45 female | 5 college and more      | 3000 KRW and more | 2.00   | 1.00 | 2.00 | 16.00  | 5.00   | 15.80 | 14.00 | 0     | 3.848704346 | 19.06632653 |
| Y | Y | u-123 | ulsan | 65.00 | 35 female | 6 college and more      | 3000 KRW and more | 1.00   | 1.00 | 2.00 | 1.00   | 5.00   | 16.00 | 15.30 | 0.26  | 4.030605999 | 32.80102041 |
| Y | Y | u-124 | ulsan | 66.00 | 42 female | 9 college and more      | 3000 KRW and more | 1.00   | 1.00 | 2.00 | 0.00   | 7.00   | 17.50 | 28.10 | 0.62  | 3.946337482 | 20.77040816 |
| Y | Y | u-125 | ulsan | 46.00 | 48 female | 7 college and more      | 3000 KRW and more | 2.00   | 1.00 | 2.00 | 1.00   | 0.00   | 9.60  | 15.10 | 0.06  | 3.437563762 | 7.484693878 |
| Y | Y | u-126 | ulsan | 46.00 | 33 female | 4 college and more      | 3000 KRW and more | 1.00   | 1.00 | 2.00 | 1.00   | 4.00   | 7.50  | 9.30  | 0.5   | 3.50846766  | 112.8010204 |
| Y | Y | u-127 | ulsan | 53.00 | 43 female | 4 high school and less  | 3000 KRW and more | 1.00   | 1.00 | 1.00 | 3.00   | 1.00   | 13.10 | 7.20  | 0.02  | 6.125484595 | 92.59693878 |
| Y | Y | u-128 | ulsan | 61.00 | 49 female | 5 high school and less  | 3000 KRW and more | 1.00   | 1.00 | 1.00 | 12.00  | 1.00   | 11.60 | 11.00 | 0.12  | 3.73882881  | 29.92346939 |
| Y | Y | s-1   | seoul | 65.80 | 30 female | 5 college and more      | under 3000 KRW    | 2.00   | 1.00 | 2.00 | 2.00   | 8.00   | 19.50 | 15.30 | 12.39 | 1.972173532 | 17.66297468 |
| Y | Y | s-2   | seoul | 52.10 | 51 female | 5 college and more      | under 3000 KRW    | 2.00   | 1.00 | 2.00 | 4.00   | 6.00   | 12.50 | 20.30 | 0.4   | 3.39328708  | 25.3214285  |
| Y | Y | s-3   | seoul | 62.80 | 25 female | 6 college and more      | 3000 KRW and more | 2.00   | 1.00 | 2.00 | 12.00  | 7.00   | 14.00 | 13.50 | 2.29  | 1.755039439 | 19.1693038  |
| Y | Y | s-4   | seoul | 62.80 | 54 female | 8 college and more      | 3000 KRW and more | 2.00   | 1.00 | 2.00 | 12.00  | 5.00   | 19.40 | 30.30 | 0.86  | 2.23115688  | 40.09335443 |
| Y | Y | s-5   | seoul | 56.10 | 46 female | 8 high school and less  | under 3000 KRW    | 999.00 | 1.00 | 2.00 | 5.00   | 9.00   | 21.80 | 5.20  | 3.29  | 3.9765354   | 45.3979591  |
| Y | Y | s-6   | seoul | 44.90 | 41 female | 5                       | 999 999           | 999.00 | 1.00 | 2.00 | 1.00   | 3.00   | 7.80  | 13.20 | 0.44  | 3.24984697  | 25.132653   |
| Y | Y | s-7   | seoul | 47.10 | 44 female | 5 high school and less  | 3000 KRW and more | 999.00 | 1.00 | 2.00 | 999.00 | 4.00   | 11.40 | 18.80 | 3.22  | 1.752373649 | 15.97679325 |
| Y | Y | s-8   | seoul | 37.50 | 44 female | 8 high school and less  | under 3000 KRW    | 999.00 | 1.00 | 2.00 | 30.00  | 0.00   | 13.50 | 25.00 | 4.19  | 1.955302366 | 17.48417722 |
| Y | Y | s-9   | seoul | 46.00 | 34 female | 8 college and more      | 999               | 999.00 | 1.00 | 2.00 | 0.00   | 0.00   | 11.40 | 26.80 | 1.44  | 3.30901856  | 19.9387755  |
| Y | Y | s-10  | seoul | 35.50 | 59 female | 8 college and more      | under 3000 KRW    | 999.00 | 1.00 | 2.00 | 13.00  | 31.00  | 8.20  | 18.90 | 0.5   | 3.39114466  | 26.8622449  |
| Y | Y | s-11  | seoul | 44.90 | 55 female | 2 high school and less  | under 3000 KRW    | 999.00 | 1.00 | 1.00 | 28.00  | 4.00   | 12.90 | 9.60  | 3.52  | 1.699094362 | 18.34493671 |
| Y | Y | s-12  | seoul | 59.30 | 41 female | 5 college and more      | under 3000 KRW    | 999.00 | 1.00 | 1.00 | 10.00  | 10.00  | 14.60 | 27.60 | 0.87  | 3.33003468  | 12.7806122  |
| Y | Y | s-13  | seoul | 41.80 | 63 female | 8 high school and less  | 999               | 999.00 | 1.00 | 1.00 | 4.00   | 7.00   | 19.50 | 16.90 | 0.54  | 3.56110997  | 14.9540816  |
| Y | Y | s-14  | seoul | 61.80 | 59 female | 5 high school and less  | 999               | 999.00 | 1.00 | 1.00 | 3.00   | 11.00  | 13.90 | 8.00  | 0.66  | 3.35829422  | 24.1377551  |
| Y | Y | s-15  | seoul | 53.20 | 57 female | 9 college and more      | 999               | 999.00 | 1.00 | 2.00 | 5.00   | 6.00   | 20.20 | 6.60  | 0.54  | 3.44225668  | 23.4183673  |
| Y | Y | s-16  | seoul | 58.90 | 42 female | 4 college and more      | 3000 KRW and more | 999.00 | 1.00 | 1.00 | 3.00   | 7.00   | 10.50 | 11.90 | 3.95  | 1.593229623 | 19.69831224 |
| Y | Y | s-17  | seoul | 57.40 | 40 female | 7 college and more      | 3000 KRW and more | 999.00 | 1.00 | 2.00 | 3.00   | 0.00   | 11.40 | 7.20  | 0.56  | 3.40073454  | 30.382653   |
| Y | Y | s-18  | seoul | 50.40 | 36 female | 10 college and more     | 3000 KRW and more | 999.00 | 1.00 | 2.00 | 3.00   | 5.00   | 19.70 | 21.40 | 0.68  | 1.866564417 | 20.67879747 |
| Y | Y | s-19  | seoul | 47.90 | 20 female | 5 college and more      | under 3000 KRW    | 999.00 | 1.00 | 2.00 | 1.00   | 1.00   | 15.60 | 8.00  | 0.5   | 3.74372577  | 33.2295918  |
| Y | Y | s-20  | seoul | 47.90 | 23 female | 5 high school and less  | under 3000 KRW    | 999.00 | 1.00 | 2.00 | 1.00   | 57.00  | 11.90 | 11.50 | 3.03  | 1.609881683 | 14.76740506 |
| Y | Y | s-21  | seoul | 56.80 | 49 female | 4 college and more      | 3000 KRW and more | 999.00 | 1.00 | 1.00 | 20.00  | 1.00   | 8.60  | 16.60 | 5.86  | 1.589249197 | 21.40981013 |
| Y | Y | s-22  | seoul | 56.80 | 21 female | 7 high school and less  | 3000 KRW and more | 999.00 | 1.00 | 2.00 | 999.00 | 0.00   | 8.00  | 24.80 | 0.98  | 1.899430324 | 15.85126582 |
| Y | Y | s-23  | seoul | 49.70 | 60 female | 8 high school and less  | 999               | 999.00 | 1.00 | 2.00 | 10.00  | 19.00  | 12.70 | 21.60 | 0.32  | 3.10518261  | 15.6785714  |
| Y | Y | s-24  | seoul | 65.90 | 45 female | 6 high school and less  | 3000 KRW and more | 999.00 | 1.00 | 1.00 | 9.00   | 56.00  | 15.20 | 21.90 | 0.46  | 1.864263804 | 20.41297468 |
| Y | Y | s-25  | seoul | 38.90 | 25 female | 7 college and more      | under 3000 KRW    | 999.00 | 1.00 | 2.00 | 26.00  | 11.00  | 15.30 | 13.80 | 8.74  | 1.950810692 | 21.06170886 |
| Y | Y | s-26  | seoul | 69.90 | 44 female | 10 high school and less | under 3000 KRW    | 999.00 | 1.00 | 2.00 | 15.00  | 0.00   | 12.40 | 7.80  | 5.76  | 1.707493427 | 14.98259494 |
| Y | Y | s-27  | seoul | 45.20 | 57 female | 3 high school and less  | under 3000 KRW    | 999.00 | 1.00 | 2.00 | 8.00   | 3.00   | 6.70  | 12.00 | 1.42  | 1.628177038 | 22.9556962  |
| Y | Y | s-28  | seoul | 66.30 | 62 female | 3 college and more      | 3000 KRW and more | 999.00 | 1.00 | 2.00 | 12.00  | 2.00   | 5.70  | 22.80 | 0.24  | 3.88237094  | 35.382653   |
| Y | Y | s-29  | seoul | 68.60 | 52 female | 9 high school and less  | 3000 KRW and more | 999.00 | 1.00 | 1.00 | 7.00   | 6.00   | 20.20 | 12.60 | 0.36  | 3.25453989  | 14.127551   |
| Y | Y | s-30  | seoul | 61.00 | 56 female | 5 college and more      | under 3000 KRW    | 999.00 | 1.00 | 1.00 | 10.00  | 15.00  | 15.70 | 4.30  | 2.76  | 2.126971954 | 44.63449367 |
| Y | Y | s-31  | seoul | 72.50 | 41 female | 10 high school and less | 3000 KRW and more | 999.00 | 1.00 | 2.00 | 0.00   | 12.00  | 8.00  | 20.20 | 4.61  | 1.793163891 | 18.75738397 |
| Y | Y | s-32  | seoul | 71.30 | 32 female | 5 college and more      | 3000 KRW and more | 999.00 | 1.00 | 2.00 | 3.00   | 4.00   | 9.50  | 15.10 | 2.36  | 1.608567046 | 15.94303797 |
| Y | Y | s-33  | seoul | 39.80 | 67 female | 8 high school and less  | under 3000 KRW    | 999.00 | 1.00 | 2.00 | 5.00   | 0.00   | 17.10 | 25.00 | 0.62  | 1.687445223 | 12.36867089 |
| Y | Y | s-34  | seoul | 44.40 | 71 female | 7 high school and less  | under 3000 KRW    | 999.00 | 1.00 | 2.00 | 1.00   | 16.00  | 13.70 | 10.50 | 12.62 | 2.004601227 | 20.86550633 |
| Y | Y | s-35  | seoul | 40.60 | 42 female | 8 high school and less  | under 3000 KRW    | 999.00 | 1.00 | 2.00 | 10.00  | 0.00   | 6.20  | 18.10 | 4.55  | 1.619412796 | 16.61708861 |
| Y | Y | s-36  | seoul | 50.40 | 56 female | 10 high school and less | under 3000 KRW    | 999.00 | 1.00 | 2.00 | 0.00   | 0.00   | 4.80  | 9.40  | 2     | 1.790644172 | 22.52531646 |
| Y | Y | s-37  | seoul | 52.10 | 35 female | 6 college and more      | 3000 KRW and more | 999.00 | 1.00 | 2.00 | 3.00   | 0.00   | 13.90 | 15.50 | 0.6   | 1.885078878 | 17.02531646 |
| Y | Y | s-38  | seoul | 42.00 | 51 female | 9 high school and less  | 3000 KRW and more | 999.00 | 1.00 | 2.00 | 6.00   | 0.00   | 13.10 | 10.90 | 1.64  | 1.72754163  | 20.53955696 |
| Y | Y | s-39  | seoul | 42.00 | 53 female | 8 high school and less  | 3000 KRW and more | 999.00 | 1.00 | 2.00 | 21.00  | 2.00   | 6.70  | 5.40  | 5.44  | 1.829206836 | 23.48259494 |
| Y | Y | s-40  | seoul | 49.40 | 38 female | 5 college and more      | 3000 KRW and more | 999.00 | 1.00 | 2.00 | 1.00   | 30.00  | 11.80 | 12.40 | 7.17  | 1.727906807 | 20.14820675 |
| Y | Y | s-41  | seoul | 58.60 | 33 female | 3 high school and less  | under 3000 KRW    | 999.00 | 1.00 | 2.00 | 8.00   | 43.00  | 10.70 | 16.60 | 15.57 | 1.498794917 | 22.97943038 |
| Y | Y | s-42  | seoul | 50.50 | 59 female | 8 high school and less  | under 3000 KRW    | 999.00 | 1.00 | 1.00 | 15.00  | 2.00   | 16.40 | 21.40 | 2.21  | 1.546450482 | 17.25474684 |
| Y | Y | s-43  | seoul | 59.90 | 48 female | 5 college and more      | 3000 KRW and more | 999.00 | 1.00 | 1.00 | 2.00   | 1.00   | 13.80 | 15.70 | 0.82  | 3.3428892   | 14.3622449  |
| Y | Y | s-44  | seoul | 70.60 | 47 female | 7 high school and less  | 3000 KRW and more | 999.00 | 1.00 | 1.00 | 0.00   | 999.00 | 13.70 | 12.70 | 0.1   | 3.3255458   | 8.22448979  |
